# Supplementary material
Source: Research Square preprint supplement (doi:10.21203/rs.3.rs-9067071/v1)
Supplement: Supplementary file 1 [file 0177200c6316ca63085510e4.docx]

**Bowel Preparation Quality at Alice Springs Hospital**

**Section 1: Demographics**

1. Age (years): ______
2. Sex:
   ☐ Male
   ☐ Female
3. First Nations status:
   ☐ Aboriginal
   ☐ Torres Strait Islander
   ☐ Both
   ☐ Neither

**Section 2: Clinical Variables**

1. Diabetes Mellitus:
   ☐ Yes ☐ No
2. Chronic Kidney Disease (Stage ≥3):
   ☐ Yes ☐ No
3. Hypertension:
   ☐ Yes ☐ No
4. Ischaemic Heart Disease:
   ☐ Yes ☐ No
5. Inpatient status at time of colonoscopy:
   ☐ Yes ☐ No

**Section 3: Procedural Variables**

1. Boston Bowel Preparation Scale (BBPS):
   Right colon: ___
   Transverse colon: ___
   Left colon: ___
   Total BBPS: ___
2. Previous colonoscopy:
   ☐ Yes ☐ No
3. Location of bowel preparation:
   ☐ Home-based
   ☐ Hospital-based

**Section 4: Logistical Variables**

1. Distance travelled to hospital:
   ☐ ≤200 km
   ☐ >200 km
2. Interpreter required:
   ☐ Yes ☐ No
3. Interpreter used:
   ☐ Yes ☐ No
4. Aboriginal Liaison Officer involvement:
   ☐ Yes ☐ No
